# Supplementary material for: Assessing riverbank erosion in Bangladesh using time series of Sentinel-1 radar imagery in the Google Earth Engine
Source: Copernicus journal article supplement (doi:10.5194/egusphere-2022-319), 2022-06-07
Supplement: Supplementary file [file egusphere-2022-319-AC1-supplement.pdf]

## Assessing riverbank erosion in Bangladesh using time series of Sentinel-1 radar imagery in the Google Earth Engine

### Authors' response to Referee 1

| <b>Referee comment</b>                                                                                                                                                                                                                                                                                                                                            | <b>Authors' response</b>                                                                                                                                         |
|-------------------------------------------------------------------------------------------------------------------------------------------------------------------------------------------------------------------------------------------------------------------------------------------------------------------------------------------------------------------|------------------------------------------------------------------------------------------------------------------------------------------------------------------|
| The background information in the introduction is not sufficient. So, need to address why you considered the Jamuna river? (e.g., the status/dynamics and impact of Jamuna river bank erosion). Some links to the relevant study area are given below.                                                                                                            | Thank you for this remark. We will extend our justification of the case study selection in the introduction accordingly and add further references where needed. |
| How are the present study/methodology/findings superior (e.g., degree of accuracy, etc.) compared to the results of other studies already completed on the Jamuna river? Because, recently, there are several studies already have done on the Jamuna river! The discussion part should enlarge.                                                                  | We will extend the critical reflection of our contribution in the discussion section with a focus on the added value of our radar-remote-sensing-based approach. |
| A number of the concluding statements included the abstract, introduction, discussion, and conclusions concerning the applicability of the work. These repetitions should be either removed or modified significantly.                                                                                                                                            | Indeed, some sections are redundant, and we will either remove or adapt those to reduce redundancies.                                                            |
| The appendices might be fixed in the main body of the paper (optional).                                                                                                                                                                                                                                                                                           | In order to keep the main part of the paper compact, we chose to shift non-essential additional material to the appendices.                                      |
| <i>Need references for the following statements:</i><br><br>- In Bangladesh, located in one of the world's largest river deltas (....)<br><br>-Jamuna River is one of the largest braided river systems in the world, forming various channels at a total width of around 12 km (....)<br><br>-Since the 1970s, its bank line has shifted by around 20 km (.....) | Thank you for pointing this out. We will add references for the highlighted statements.                                                                          |
