# Supplementary material for: Assessing riverbank erosion in Bangladesh using time series of Sentinel-1 radar imagery in the Google Earth Engine
Source: Copernicus journal article supplement (doi:10.5194/egusphere-2022-319), 2022-06-07
Supplement: Supplementary file [file egusphere-2022-319-RC1-supplement.pdf]

**Assessing riverbank erosion in Bangladesh using time series of Sentinel-1 radar imagery in the Google Earth Engine Recommendation: Minor revision**

**Recommendation:** Minor revision

**General Comments:**

This paper presents a well-designed, effectively executed, and clearly communicated project that assessed the Jamuna riverbank erosion in Bangladesh using the time series of Sentinel-1. The paper tried to contribute in the methodological aspect. The methodology is clear with the supporting documents. However, the background information in the introduction is not sufficient. So, need to address why considered the Jamuna river? (e.g., the status/dynamics and impact of Jamuna river bank erosion). Some links to the relevant study area are given below:

[-https://doi.org/10.1080/15715124.2022.2068561](https://doi.org/10.1080/15715124.2022.2068561)

[-https://doi.org/10.4236/gep.2017.59006](https://doi.org/10.4236/gep.2017.59006)

-Assessing the long-term planform dynamics of Ganges–Jamuna confluence with the aid of remote sensing and GIS (10.1007/s11069-022-05416-6)

-Prediction of fluvial erosion rate in Jamuna River, Bangladesh (10.1080/15715124.2022.2068561)

-Jamuna River Erosional Hazards, Accretion & Annual Water Discharge – A Remote Sensing & GIS Approach (doi:10.5194/isprsarchives-XL-7-W3-831-2015)

--How are the present study/methodology/findings superior (e.g., degree of accuracy, etc.) compared to the results of other studies already completed on the Jamuna river? Because, recently, there are several studies already have done on the Jamuna river! The discussion part should enlarge.....

--A number of the concluding statements included the abstract, introduction, discussion, and conclusions concerning the applicability of the work. These repetitions should be either removed or modified significantly.

--The appendices might be fix in the main body of the paper (optional)

These and other specific points to be addressed are listed in the table below.

| Actual Page number in document (Line number) | Comment                                                                                                                                                                                                             |
|----------------------------------------------|---------------------------------------------------------------------------------------------------------------------------------------------------------------------------------------------------------------------|
| 1<br>(22-23)                                 | Need references for the following statements:<br><br>- In Bangladesh, located in one of the largest river deltas of the world (....)                                                                                |
| 1<br>(28-30)                                 | -Jamuna River is one of the largest braided river systems in the world, forming various channels at a total width of around 12 km (....)<br><br>-Since the 1970s, its bank line has shifted by around 20 km (.....) |
